# Supplementary material
Source: publisher figshare collection journal article supplement (https://diabetesjournals.figshare.com/articles/dataset/_/21977249)
Supplement: Supplementary file 2 [file 1]

Supplementary Table 1: RT-PCR primers

| Name                | Sequence (5'-3')         |
|---------------------|--------------------------|
| 18S-F               | ACCGCAGCTAGGAATAATGGA    |
| 18S-R               | CAAATGCTTTCGCTCTGGTC     |
| mUCP1-F             | ACTGCCACACCTCCAGTCATT    |
| mUCP1-R             | CTTTGCCTCACTCAGGATTGG    |
| mTR $\alpha$ -F     | ATGGAACAGAAGCCAAGCAA     |
| mTR $\alpha$ -R     | TTCCATCTGGTGACCTGGCA     |
| mTR $\beta$ -F      | AGGGTACCACTATCGCTGCA     |
| mTR $\beta$ -R      | GCGGGTGACTTTGTCTATGA     |
| mChREBP-F           | CACTCAGGGAATACACGCCTAC   |
| mChREBP-R           | ATCTTGGTCTTAGGGTCTTCAGG  |
| mChREBP $\alpha$ -F | CGACACTCACCCACCTCTTC     |
| mChREBP $\alpha$ -R | TTGTTCA GCCGGATCTTGTC    |
| mChREBP $\beta$ -F  | TTGTTCA GCCGGATCTTGTC    |
| mChREBP $\beta$ -R  | CTTGTC CCGGCATAGCAAC     |
| mSREBP1C-F          | GCAGCCACCATCTAGCCTG      |
| mSREBP1C-R          | CAGCAGTGAGTCTGCCTTGAT    |
| mELOVL6-F           | TCAGCAAAGCACCCGAAC       |
| mELOVL6-R           | AGCGACCATGTCTTTGTAGGAG   |
| mGLUT4-F            | GTGACTGGAACACTGGTCCTA    |
| mGLUT4-R            | CCAGCCAGTTGCATTGTAG      |
| mACC1-F             | TGGACAGACTGATCGCAGAGAAAG |
| mACC1-R             | TGGAGAGCCCCACACACA       |
| mATGL-F             | TGTGGCCTCATTCCTCCTAC     |
| mATGL-R             | TCGTGGATGTTGGTGGAGCT     |
| mCPT1B-F            | TTCAAACTACACGCATCCC      |
| mCPT1B-R            | TGGACAGACTGATCGCAGAGAAAG |
| mPPAR $\alpha$ -F   | AGAGCCCCATCTGTCCTCTC     |
| mPPAR $\alpha$ -R   | ACTGGTAGTCTGCAAAACCAAA   |
| mACLY-F             | ACCCTTTCACTGGGGATCACA    |
| mACLY-R             | GACAGGGATCAGGTATTCCTTG   |
| mSCD1-F             | TTCTTGCGATACTCTGGTGC     |
| mSCD1-R             | CGGGATTGAATGTTCTTGTCGT   |
| mFASN-F             | AAGCGGTCTGGAAAGCTGAA     |
| mFASN-R             | AGGCTGGGTTGATACCTCCA     |
| mVLCAD-F            | CTACTGTGCTTCAGGGACAAC    |
| mVLCAD-R            | CAAAGGACTTCGATTCTGCCC    |
| mDIO2-F             | CAGTGTGGTGCACGTCTCCAATC  |
| mDIO2-R             | TGAACCAAAGTTGACCACCAG    |
| mCOX8B-F            | GAACCATGAAGCCAACGACT     |
| mCOX8B-R            | GCGAAGTTCACAGTGGTTCC     |
| mCIDEA-F            | TGCTCTTCTGTATCGCCCAGT    |
| mCIDEA-R            | GCCGTGTTAAGGAATCTGCTG    |

|                   |                            |
|-------------------|----------------------------|
| mPGC1 $\alpha$ -F | TGATGTGAATGACTTGGATACAGACA |
| mPGC1 $\alpha$ -R | GCTCATTGTTGTACTGGTTGGATATG |
| mHK2-F            | AGAGAACAAGGGCGAGGAG        |
| mHK2-R            | GGAAGCGGACATCACAATC        |
| mPFK1-F           | GCCTATCTCATCCAGCTACG       |
| mPFK1-R           | CTTGCTACTCAGGAT TCGGT      |
| mPFKP-F           | AAGCTATCGGTGTCCTGACC       |
| mPFKP-R           | TCCCACCCACT TGCAGAAT       |
| mPGK1-F           | GAGCCTCACTGTCCAAACTA       |
| mPGK1-R           | CTTTAGCGCCTCCCAAGATA       |
| mPKM2-F           | TGCTGCAGTGGGGCCATTAT       |
| mPKM2-R           | GAGTCACGGCAATGATAGGA       |
| mGAPDH-F          | AGAACATCATCCCTGCATCC       |
| mGAPDH-R          | GGTCCTCAGTGTAGCCCAAG       |
| mPDK4-F           | AGGGAGGTCGAGCTGTTCTC       |
| mPDK4-R           | GGAGTGTTCACTAAGCGGTCA      |
| mGYK-F            | ACCCTCCATGCCTGAAACAA       |
| mGYK-R            | ACCACTTTCTGGAGACTGAGTT     |
| mDGAT2-F          | GCGCTACTTCCGAGACTACTT      |
| mDGAT2-R          | GGGCCTTATGCCAGGAAACT       |

Supplementary Table 2: Antibodies for western blot

| Antibody | Source (Catalog number)       |
|----------|-------------------------------|
| UCP1     | Abcam (ab10983)               |
| ChREBP   | Novus Biologicals (NB400-135) |
| ACLY     | CST (4332S)                   |
| ACC1     | CST (C83B10)                  |
| FASN     | CST (3180S)                   |
| SCD1     | CST (2794S)                   |
| ACTIN    | CST (4970S)                   |
| HSP90    | CST (4874S)                   |
| TUBULIN  | Sigma/flu/Ald (420289)        |

Supplementary Table 3: Primers for ChIP assay

| Name     | Sequence (5'-3')       |
|----------|------------------------|
| ChREBP-F | AGGAAGGATGCCAGGGGA     |
| ChREBP-R | ATTTCGTCCTCGGGTGGC     |
| ACLY-F   | AAAGCAGGTCTAACGCACTGG  |
| ACLY-R   | GCTATAGCACTTCTCCCTGGAC |
| ACC1-F   | TCCTTCCTCTCCTTCCTTAG   |
| ACC1-R   | GTGTTTAGCACTGTTTTGCGG  |

---

|         |                        |
|---------|------------------------|
| FASN-F  | CCTATCCTGCCTACTGCTCCCG |
| FASN-R  | GGCAACAGCGGCAAAGCACT   |
| SCD1-F  | CTTTACCCTTTGCTGGCA     |
| SCD1-R  | CGTTGGTGTAGGCGAGT      |
| GLUT4-F | AAGGCTCCATCTCCTTTGCC   |
| GLUT4-R | AACTCCAGCAGGATGACATAG  |
| PDK4-F  | GTGAGCTCTCATGGGGGAAAA  |
| PDK4-R  | GGGACGCTGTAACGACTTGG   |
| UCP1-F  | TAGTCGTCACCTTTCCACTC   |
| UCP1-R  | TATGGCAGAATGAAATTCTC   |

---
